# Supplementary material for: IMPemBra: a phase 2 study comparing pembrolizumab with intermittent/short-term dual MAPK pathway inhibition plus pembrolizumab in patients with melanoma harboring the BRAFV600 mutation
Source: PubMed Central journal article supplement — J Immunother Cancer. 2023 Jul 21;11(7):e006821. doi: 10.1136/jitc-2023-006821 (PMC10364170; doi:10.1136/jitc-2023-006821), 2023-07-21
Supplement: jitc-2023-006821supp001.pdf [file jitc-2023-006821supp001.pdf]

# Supplemental Materials

Supplement to: ‘The IMPemBra trial, a phase 2 study comparing pembrolizumab with intermittent/short-term dual MAPK pathway inhibition plus pembrolizumab in melanoma patients harboring the BRAFV600 mutation’

| Content                | Page |
|------------------------|------|
| Supplemental Figure S1 | 2    |
| Supplemental Figure S2 | 4    |
| References             | 5    |

Supplemental figure S1

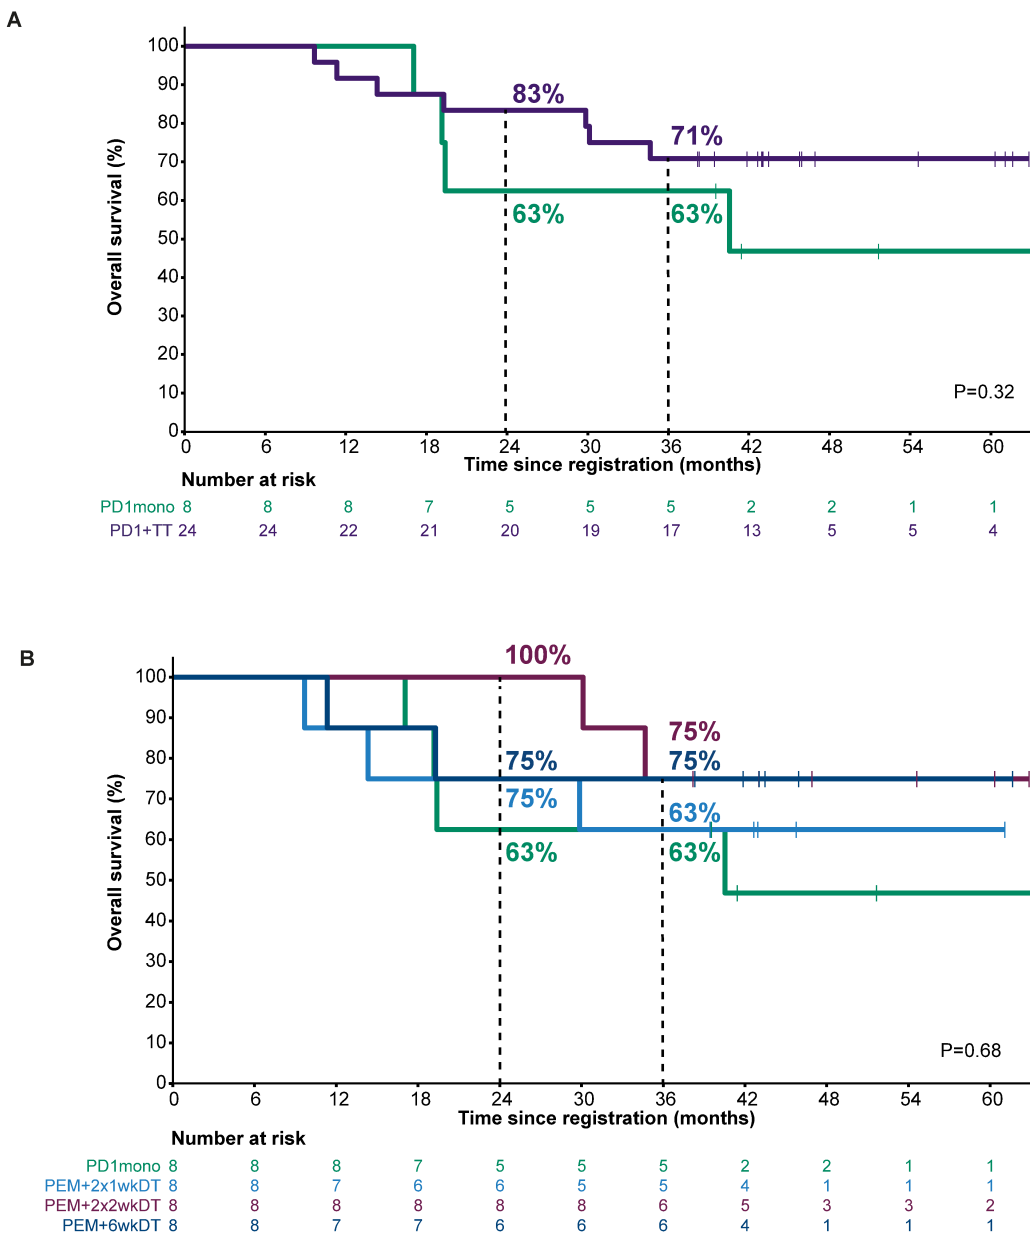

**Supplemental Figure S1**

- A. Overall-survival curves, comparing patients treated with pembrolizumab only (green) to patients who received pembrolizumab with short-term dabrafenib plus trametinib (purple).
- B. Overall survival curves of all individual cohorts.

Supplemental figure S2

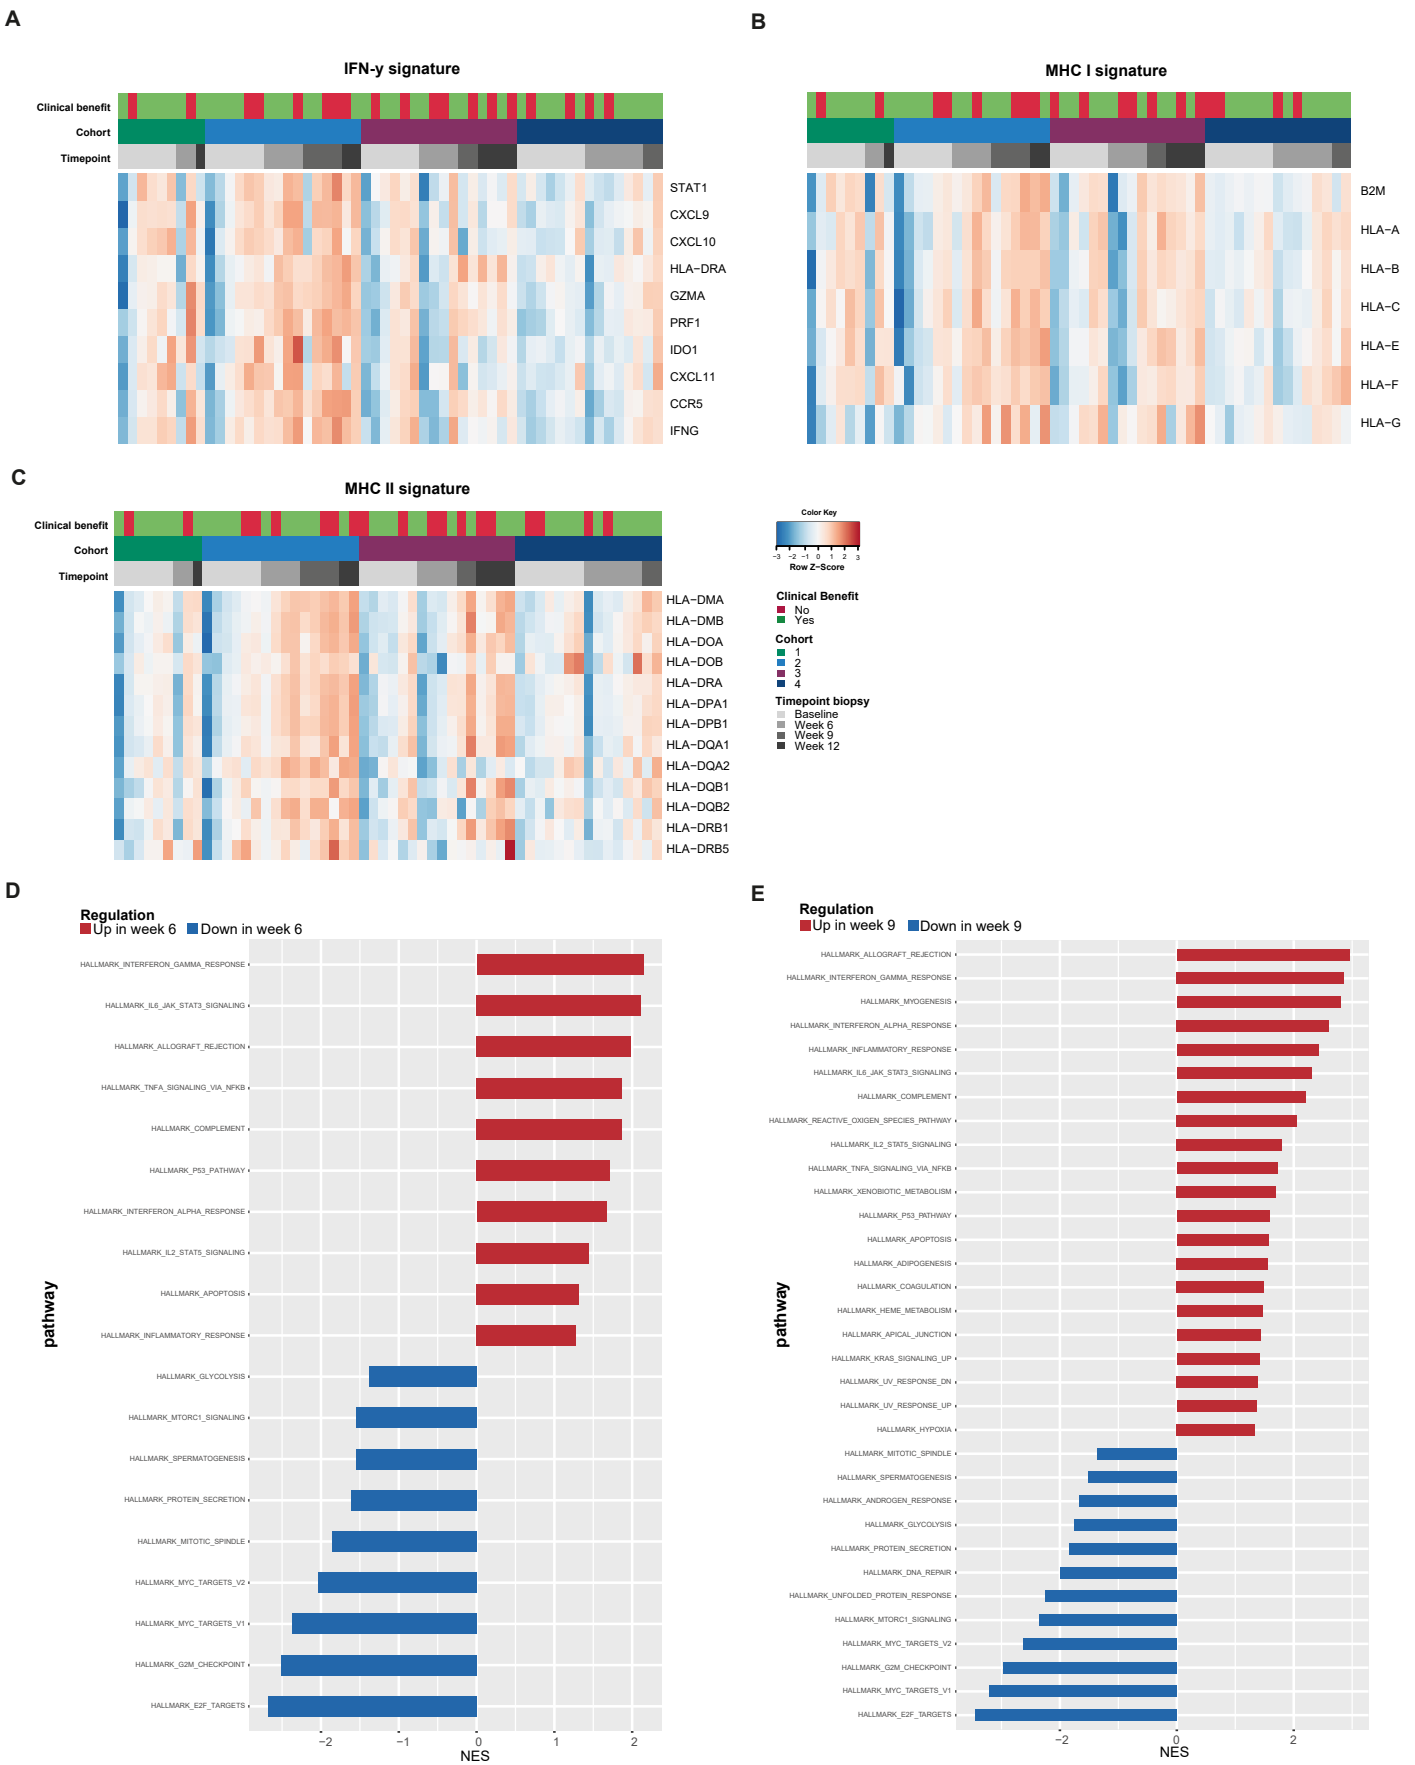

## Supplemental Figure S2

Heatmap of the IFN- $\gamma$  RNA signature<sup>1</sup> (A), MHC I signature (B) and MHC II signature (C) as previously described<sup>2</sup>, ordered according average z-score of all genes, per cohort and time point. Z-scores were calculated based on the gene expression counts normalized by DESeq2. Each column represents a different biopsy. For every biopsy it is indicated on which time point it was taken (greyscale), in which cohort the corresponding patients was treated (dark green: cohort 1, light blue: cohort 2, indigo: cohort 3, dark blue: cohort 4) and whether the patient had clinical benefit (light green: clinical benefit, red: no clinical benefit). Positive values (red) indicate higher expression and negative values (blue) indicate lower expression. D. Gene set enrichment analysis (GSEA) displaying hallmark gene sets that are significantly enriched in week 6 (red) or downregulated in week 6 (blue) as compared to baseline. Pathways are ordered according to the normalized enrichment scores (NES). NES were computed as previously described<sup>3</sup>. E. GSEA displaying hallmark gene sets that are significantly enriched in week 9 (red) or downregulated in week 9 (blue) as compared to week 6, only in patients in cohort 2-4 whom were treated with additional targeted therapy during those weeks. Pathways are ordered according to the normalized enrichment scores (NES). NES were computed as previously described<sup>3</sup>

## References

1. Ayers M, Lunceford J, Nebozhyn M, et al. IFN-gamma-related mRNA profile predicts clinical response to PD-1 blockade. *The Journal of clinical investigation* 2017;127(8):2930-40. doi: 10.1172/JCI91190
2. Ribas A, Lawrence D, Atkinson V, et al. Combined BRAF and MEK inhibition with PD-1 blockade immunotherapy in BRAF-mutant melanoma. *Nature medicine* 2019;25(6):936-40. doi: 10.1038/s41591-019-0476-5 [published Online First: 2019/06/07]
3. Subramanian A, Tamayo P, Mootha VK, et al. Gene set enrichment analysis: A knowledge-based approach for interpreting genome-wide expression profiles. *Proceedings of the National Academy of Sciences* 2005;102(43):15545-50. doi: 10.1073/pnas.0506580102
